# Supplementary material for: Positive Selection and Multiple Losses of the LINE-1-Derived L1TD1 Gene in Mammals Suggest a Dual Role in Genome Defense and Pluripotency
Source: PubMed Central journal article supplement (PMC4161310; doi:10.1371/journal.pgen.1004531), 2014-09-11

Figure S2

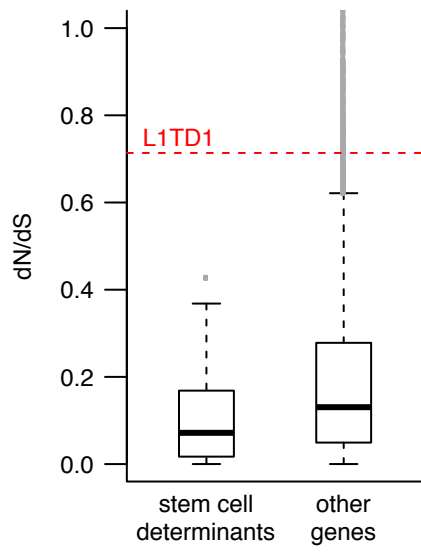

Supplement: pgen.1004531.s004.pdf [file pgen.1004531.s004.pdf]
